# Supplementary material for: Predictive validity and reliability of the Poisoning Severity Score in a pediatric poisoned population: a multicenter retrospective study
Source: Research Square preprint supplement (doi:10.21203/rs.3.rs-4209125/v1), 2024-04-10
Supplement: Supplementary file 2 [file be0ed6a20c60b9f113c9b23e.docx]

Table 2. Discrimination characteristics of the PSS(t0) and comparison to the PELODS(t0)

|  | **Unadjusted models*** | | | **Adjusted models**** | | | | |
| --- | --- | --- | --- | --- | --- | --- | --- | --- |
|  | PSS(t0)  AUC | PELODS(t0)  AUC | DeLong test** | |  | PSS(t0)  AUC | PELODS(t0)  AUC | DeLong test** |
|  | (95% CI) | (95% CI) | p-value | |  | (95% CI) | (95% CI) | p-value |
| Admission  N = 140 / 469 (29.9%) | 0.690  (0.649-0.732) | 0.506  (0.491-0.522) | **<.0001** | |  | 0.902  (0.871-0.933) | 0.878  (0.844-0.912) | **0.001** |
| ICU hospitalization  N = 109 / 469 (23.3%) | 0.649  (0.601-0.697) | 0.508  (0.492-0.523) | **<.0001** | |  | 0.901  (0.868-0.935) | 0.882  (0.845-0.919) | **0.001** |
| Hospital length of stay ≥ 12 hours  N = 189 / 469 (40.3%) | 0.666  (0.632-0.700) | 0.512  (0.497-0.526) | **<.0001** | |  | 0.898  (0.868-0.928) | 0.882  (0.850-0.914) | **0.003** |
| Follow-up after discharge or psychiatric hospitalization  N = 83 / 469 (17.7%) | 0.569  (0.519-0.620) | 0.511  (0.496-0.526) | **0.03** | |  | 0.887  (0.852-0.921) | 0.887  (0.853-0.922) | 0.7 |

The PSS(t0) was included in the models as a 3-levels hierarchical variable (0, 1, 2-3). The PELODS(t0) had only two categories and was treated as a binary variable (0 and 1)

*Modeling of each outcome according to the severity scores only.

**Adjusted for the severity scores and: physicians' main specialty, age group, sex, presence of comorbidities, ingestion of ≥2 toxic substances, poisoning mechanism, and the delay between intoxication and arrival at the Emergency Department

**Statistically significant comparison tests are in bold (p-value < 0.05)
