# Supplementary material for: Predictive validity and reliability of the Poisoning Severity Score in a pediatric poisoned population: a multicenter retrospective study
Source: Research Square preprint supplement (doi:10.21203/rs.3.rs-4209125/v1), 2024-04-10
Supplement: Supplementary file 3 [file e017e5245ce0adf44294223c.docx]

Table 4. Inter-rater agreement for minimal and mean measures of the PSS and the PELODS during follow-up

|  | **Minimal scores of the PSS** | **Mean scores of the PSS** |
| --- | --- | --- |
|  | Weighted Kappa coefficient* (95%CI) | Weighted Kappa coefficient* (95%CI) |
| t0, n = 65 | 82.4%  (71.1%-93.8%) | 78.8%  (68.9%-88.7%) |
| t12, n=62 | 76.8%  (60.7%-92.9%) | 82.0%  (70.5%-93.5%) |
| t24, n=52 | 64.0%  (46.1%-82.0%) | 64.3%  (50.0%-78.7%) |
| t48, n=37 | 84.0%  (60.8%-100%) | 58.8%  (36.0%-81.6%) |
| t72, n=28 | 72.6%  (41.6%-100%) | 73.4%  (51.4%-95.5%) |

* Cicchetti-Allison weights (linear weights)
