# Supplementary material for: Predictive validity and reliability of the Poisoning Severity Score in a pediatric poisoned population: a multicenter retrospective study
Source: Research Square preprint supplement (doi:10.21203/rs.3.rs-4209125/v1), 2024-04-10
Supplement: Supplementary file 4 [file e4f5eab18552fcd48a00d697.docx]

Table 3. Discrimination characteristics of the ∆PSS and comparison to the ∆PELODS

|  | **Unadjusted models*, N = 469** | | | **Adjusted models**, N = 469** | | | | |
| --- | --- | --- | --- | --- | --- | --- | --- | --- |
|  | ∆PSS  AUC | ∆PELODS  AUC | DeLong test** | |  | ∆PSS  AUC | ∆PELODS  AUC | DeLong test** |
|  | (95% CI) | (95% CI) | p-value | |  | (95% CI) | (95% CI) | p-value |
| Admission  N = 140 / 469 (29.9%) | 0.626  (0.581-0.670) | 0.498  (0.485-0.510) | **<.0001** | |  | 0.890  (0.858-0.921) | 0.867  (0.845-0.910) | **0.03** |
| ICU hospitalization  N = 109 / 469 (23.3%) | 0.604  (0.555-0.652) | 0.488  (0.472-0.503) | **<.0001** | |  | 0.872  (0.833-0.911) | 0.867  (0.828-0.906) | 0.4 |
| Hospital length of stay ≥ 12 hours  N = 189 / 469 (40.3%) | 0.609  (0.572-0.645) | 0.489  (0.479-0.500) | **<.0001** | |  | 0.882  (0.849-0.915) | 0.875  (0.843-0.908) | 0.3 |
| Follow-up after discharge or psychiatric hospitalization  N = 83 / 469 (17.7%) | 0.529  (0.477-0.582) | 0.498  (0.485-0.511) | 0.25 | |  | 0.863  (0.823-0.904) | 0.868  (0.829-0.907) | 0.4 |

The ∆PSS and ∆PELODS were treated as 3-classes categorical variables: decrease, stabilization, and increase.

*Modeling of each outcome according to the severity scores only.

**Adjusted for the severity scores and: physicians' main specialty, age group, sex, presence of comorbidities, ingestion of ≥2 toxic substances, poisoning mechanism, and the delay between intoxication and arrival at the Emergency Department

**Statistically significant comparison tests are in bold (p-value < 0.05)
