# Supplementary material for: Predictive validity and reliability of the Poisoning Severity Score in a pediatric poisoned population: a multicenter retrospective study
Source: Research Square preprint supplement (doi:10.21203/rs.3.rs-4209125/v1), 2024-04-10
Supplement: Supplementary file 5 [file ef6ce7b012edb964ef498d5b.docx]

Table 1. Characteristics of 469 children poisoned by a carbo-adsorbable substance and hospitalized in 3 healthcare facilities in the province of Québec

|  | **All children**  N = 469 | **Admitted**  N = 140 (29.9%) |
| --- | --- | --- |
| **General characteristics, n (%)** |  |  |
| Age group |  |  |
| 0-5 years old | 261 (55.6) | 27 (19.3) |
| 6-11 years old | 15 (3.2) | 3 (2.1) |
| 12-17 years old | 193 (41.2) | 110 (78.6) |
| Girls | 282 (60.1) | 101 (72.1) |
| Comorbidities (yes) | 176 (37.5) | 96 (68.6) |
| Comorbidities type |  |  |
| Diagnosed mental health issue* | 116 (24.7) | 77 (55.0) |
| ADHD | 79 (16.8) | 56 (40.0) |
| Pulmonary issue (asthma, sleep apnea) | 34 (7.3) | 12 (8.6) |
| Cardiovascular issue (heart rate anomaly, high-blood pressure) | 24 (5.1) | 12 (8.6) |
| Digestive issue (acid reflux, Crohn’s disease) | 14 (3.0) | 10 (7.1) |
| Epilepsy | 8 (1.7) | 6 (4.3) |
| Rheumatoid arthritis | 3 (0.6) | 1 (0.7) |
| Diabetes | 2 (0.4) | 1 (0.7) |
| Renal failure | 2 (0.4) | 2 (1.4) |
| Cancer | 1 (0.2) | 1 (0.7) |
| Usual medications (yes) | 179 (38.2) | 77 (55.0) |
| Medication at the time of poisoning |  |  |
| Antidepressant | 60 (12.8) | 37 (26.4) |
| Psychostimulant | 43 (9.2) | 27 (19.3) |
| Antipsychotic | 34 (7.3) | 20 (14.3) |
| Oral contraceptive | 23 (4.9) | 13 (9.3) |
| Antibiotic | 23 (4.9) | 4 (2.9) |
| Painkiller (acetaminophen) | 19 (4.1) | 8 (5.7) |
| Anti-inflammatory | 19 (4.0) | 9 (6.4) |
| Gastro-intestinal med | 14 (3.0) | 10 (7.1) |
| Corticosteroid | 11 (2.3) | 4 (2.9) |
| Antiepileptic | 8 (1.7) | 3 (2.1) |
| Benzodiazepine | 6 (1.3) | 4 (2.9) |
| Opioid | 5 (1.1) | 2 (1.4) |
| Anti-hypertensive | 5 (1.1) | 1 (0.7) |
| Anti-arrhythmic | 4 (0.9) | 1 (0.7) |
| Insulin | 2 (0.4) | 1 (0.7) |
| Anticoagulant | 1 (0.2) | - |
| Immunosuppressive med | 1 (0.2) | 1 (0.7) |
| Alcoholism (yes) | 4 (0.9) | 2 (1.4) |
| Smoking (yes) | 32 (6.8) | 22 (15.7) |
| Regular illicit substance use (yes) | 52 (11.1) | 31 (22.1) |
| **Intoxication characteristics and toxicity assessment at arrival in the ED (t0), n (%)** | | |
| Physicians' medical specialty |  |  |
| Emergency physicians specialized in pediatrics | 161 (34.3) | 40 (28.6) |
| Pediatricians specialized in emergency | 308 (65.7) | 100 (71.4) |
| Ingestion of ≥2 toxic substances (yes) | 116 (24.7) | 62 (44.3) |
| Intentional exposure (yes) | 179 (38.2) | 108 (77.1) |
| Type of toxic agents ingested |  |  |
| Painkiller (acetaminophen) | 153 (32.6) | 57 (40.7) |
| Antidepressant | 71 (15.1) | 37 (26.4) |
| Anti-inflammatory | 56 (11.9) | 14 (10.0) |
| Antihistaminic | 33 (7.0) | 7 (5.0) |
| Psychostimulant | 31 (6.6) | 19 (13.6) |
| Antipsychotic | 30 (6.4) | 15 (10.7) |
| Anti-hypertensive | 28 (6.0) | 7 (5.0) |
| Benzodiazepine | 19 (4.1) | 10 (7.1) |
| Anticoagulant | 19 (4.1) | 6 (4.3) |
| Gastro-intestinal med | 16(3.4) | 3 (2.1) |
| Opioid | 15 (3.2) | 3 (2.1) |
| Anti-arrhythmic | 13 (2.8) | 7 (5.0) |
| Antiepileptic | 11 (2.4) | 4 (2.9) |
| Antibiotic | 10 (2.1) | 4 (2.9) |
| Insulin or oral antidiabetic | 7 (1.5) | 2 (1.4) |
| Oral contraceptive | 5 (1.1) | 4 (2.9) |
| Immunosuppressive med | 4 (0.9) | 2 (1.4) |
| Natural medicine | 3 (0.6) | - |
| Non-medicinal potential carbo-adsorbable substance | 33 (7.0) | 15 (10.7) |
| Call to local PCC before or at arrival (yes) | 412 (87.9) | 128 (91.4) |
| Time from ingestion to arrival at the hospital (t0) |  |  |
| Less than 90 minutes | 144 (30.7) | 22 (15.7) |
| Between 90 and 150 minutes | 134 (28.6) | 40 (28.6) |
| More than 150 minutes | 191 (40.7) | 78 (55.7) |
| Transfer from another hospital (yes) | 20 (4.3) | 13 (9.3) |
| Initial PSS |  |  |
| 0 = no symptom | 403 (85.9) | 83 (59.3) |
| 1 = minor intoxication | 54 (11.5) | 46 (32.9) |
| 2 = moderate intoxication | 11 (2.4) | 10 (7.1) |
| 3 = severe intoxication | 1 (0.2) | 1 (0.7) |
| 4 = death | - | - |
| Initial PELODS |  |  |
| 1 = low severity | 455 (97.0) | 137 (97.9) |
| 2 = moderate severity | 14 (3.0) | 3 (2.1) |
| 3 = high severity | - | - |
| **Toxicity progression and treatment characteristics in the first 12 hours after arrival at the ED, n (%)** | | |
| Administration of ≥1 antidote or decontaminating agent (yes) | 186 (39.7) | 94 (67.1) |
| Therapeutic administered |  |  |
| Administration of NAC | 47 (10.0) | 40 (28.6) |
| Administration of AC | 99 (21.1) | 26 (18.6) |
| ∆PSS (t0-t12) |  |  |
| Decreased toxicity | 50 (10.7) | 43 (30.7) |
| Stable toxicity | 354 (75.4) | 91 (65.0) |
| Increased toxicity | 65 (13.9) | 6 (4.3) |
| ∆PELODS (t0-t12) |  |  |
| Decreased toxicity | 14 (3.0) | 3 (2.1) |
| Stable toxicity | 416 (88.7) | 135 (96.4) |
| Increased toxicity | 39 (8.3) | 2 (1.4) |
| **Outcomes observed in the first 72-hours of hospitalization or until discharge, n (%)** | | |
| Hemodynamic support by vasopressors (yes) | 2 (0.4) | 2 (1.4) |
| Extrarenal epuration (yes) | - | - |
| Mechanical ventilation time | 8 (1.7) | 8 (1.7) |
| ICU admission (yes) | 109 (23.3) | 109 (77.9) |
| Hospital length of stay ≥ 12 hours | 189 (40.3) | 140 (100.0) |
| Follow-up after discharge or hospitalization in a psychiatric facility | 83 (17.7) | 64 (45.7) |
| Death (yes) | - | - |

Abbreviations: ADHD = Attention-Deficit/Hyperactivity Disorder; ED = Emergency Department; PCC = Poison Control Center; PSS = Poisoning Severity Score; PELODS = Pediatric Logistic Organ Dysfunction Score; NAC = N-acetylcysteine; AC = activated charcoal; ICU = Intensive Care Unit

* Mental health issue means diagnoses such as anxiety, depression, eating disorder, previous suicide attempts, diagnosed psychiatric disorder
